# Supplementary material for: SNX9 promotes metastasis by enhancing cancer cell invasion via differential regulation of RhoGTPases
Source: PubMed Central journal article supplement — Mol Biol Cell. 2016 May 1;27(9):1409–19. doi: 10.1091/mbc.E16-02-0101 (PMC4850029; doi:10.1091/mbc.e16-02-0101), 2016-05-01
Supplement: supp_E16-02-0101v1_CombinedSupMats.pdf [file supp_E16-02-0101v1_CombinedSupMats.pdf]

# Supplemental Materials

*Molecular Biology of the Cell*

Bendris et al.

## Supplementary Material

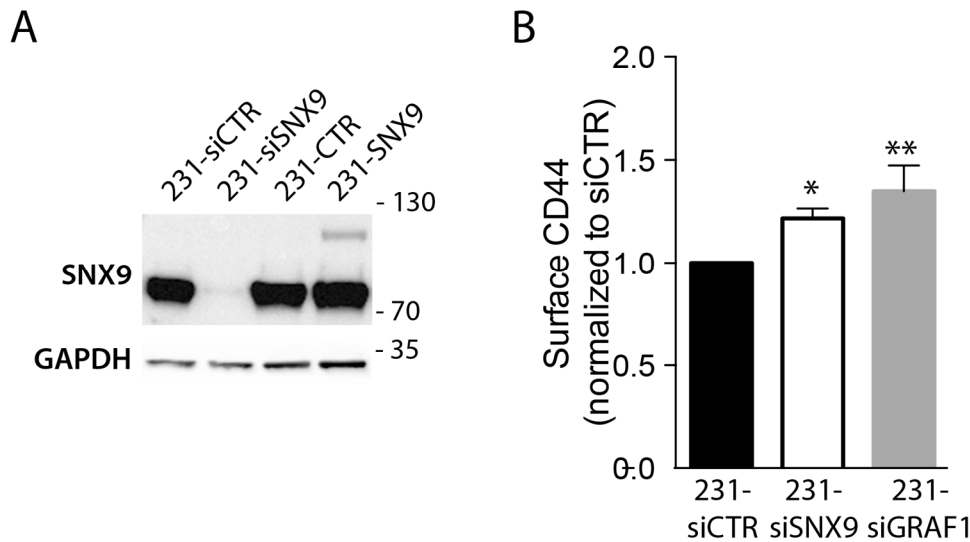

### Supplementary Fig S1:SNX9 depression increases surface expression of CD44.

**A.** Representative Western blot illustrating SNX9 overexpression or depletion levels in MDA-MB-231 cells. GAPDH was used as loading control. Blot is representative of 3 independent experiments. **B.** 231-siCTR, -siSNX9 and -siGRAF1 cells were incubated with anti-CD44 antibody at 4°C, to prevent its internalization. Cells were then washed with cold PBS to remove unbound antibody and HRP signal proportional to surface expression of CD44 was quantified as in Methods section. n=3, p\* < 0.05, p\*\* < 0.005.

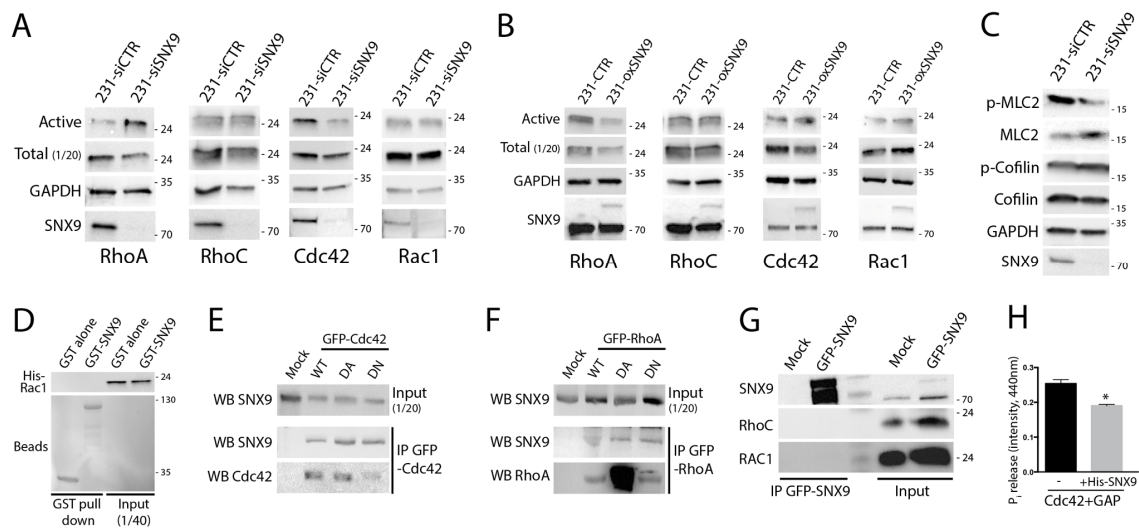

### Supplementary Fig S2:SNX9 expression modulates the activity of RhoGTPases.

**A-B.** Active forms of GTPases were pulled down using beads coupled to respective effector domains that can only bind the GTP-bound, *i.e.* active, form of the GTPases (see Methods). Blots shown here are examples from 3 independent experiments illustrating quantifications of active GTPases in 231-siSNX9 (**A**) and in 231-oxSNX9 (**B**) compared to 231-siCTR and 231-CTR cells, respectively. **C.** Representative Western blots illustrating quantification of phosphorylated cofilin and MLC2 in 231-siSNX9 compared to 231-siCTR. **D.** Western blots comparing the interaction of His-Rac1 with GST alone or with GST-SNX9 beads, *in vitro*. We used the GTPase Rac1 as a specificity control of RhoA and Cdc42 direct binding to SNX9 (see Fig 2D). **E, F.** Western blots showing interaction of endogenous SNX9 with GFP-Cdc42 mutants (**E**) or with GFP-RhoA mutants (**F**) expressed in MDA-MB-231 cells. WT=wild type, DA=dominant active, and DN=dominant negative. **G.** We used Rac1 and RhoC as a specificity control of endogenous RhoA and Cdc42 binding to GFP-SNX9 in cells, compared to Supplementary Fig 2E-F. Western blots of endogenous Rac1 or RhoC showing no interactions with pulled down GFP-SNX9, expressed in MDA-MB-231 cells. **H.** P<sub>i</sub> production after GTP hydrolysis by Cdc42 incubated with p50GAP with or without His-SNX9, *in vitro*. \*p=0.035.

Blots are representative of 3 independent experiments.

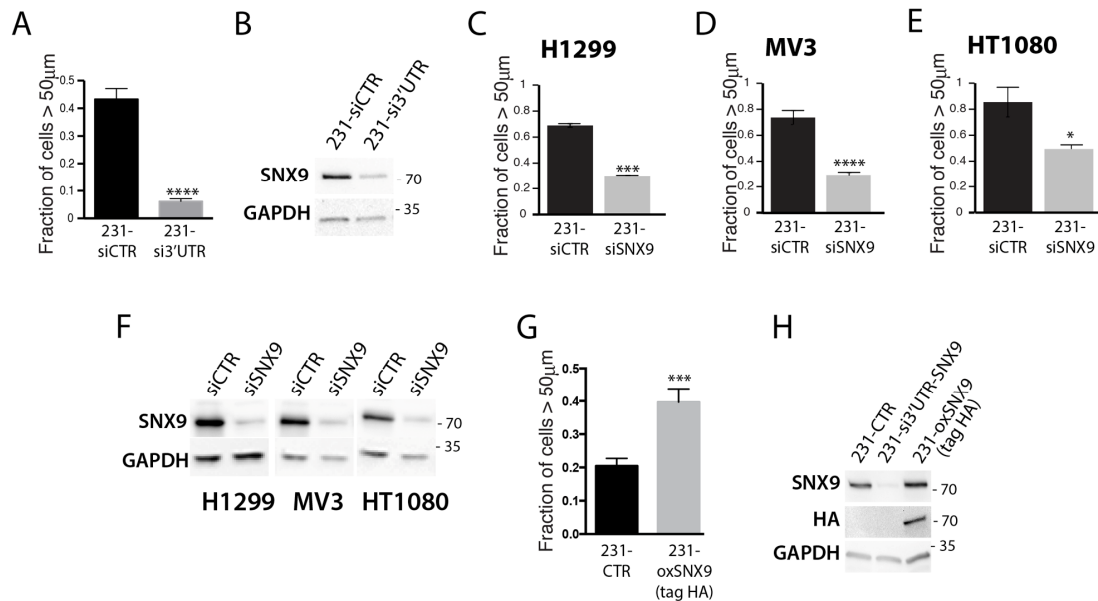

**Supplementary Fig S3: SNX9 depletion impairs cell invasiveness of cancer cell lines**

**A.** Quantification of invasion assays for control cells or cells treated with a siRNA against the 3'UTR of SNX9. n=3. \*\*\*\*p<0.0001. **B.** Western blot analysis of SNX9 expression in conditions used in (**A**). GAPDH was used as loading control. Blot is representative of 3 independent experiments. **C-E.** After appropriate siRNA depletions, H1299 (lung cancer), HT1080 (fibrosarcoma) or MV3 (melanoma) cell lines were subjected to an inverted invasion assay. Bar charts represent quantification of invading cells of H1299 (**C**), MV3 (**D**) or HT1080 (**E**). n=3. \*p=0.02, \*\*\*p=0.001, \*\*\*\*p=0.0002.

**G.** Quantification of invasion assays for control cells or cells overexpressing HA-tagged SNX9. n=3. \*\*\*p=0.0007. **F.** Western blot analysis of SNX9 expression in conditions used in (C-E). GAPDH was used as loading control. Blot is representative of 3 independent experiments. **G.** MDA-MB-231 cell line stably expressing HA-SNX9 was subjected to an inverted invasion assay, bar chart represents quantification of invading cells. n=3, \*\*\*p=0.002. **H.** Western blot analysis of SNX9 protein levels in 231-oxSNX9 expressing HA-tagged SNX9, compared to parental 231-CTR cells. Given that HA-SNX9 co-migrated with endogenous SNX9, we used si3UTR as a negative control and also used an antibody against the HA tag. GAPDH was used as loading control. Blot is representative of 3 independent experiments.
